# Supplementary material
Source: publisher site journal article supplement (https://www.dovepress.com/get_supplementary_file.php?f=247526.xlsx)
Supplement: Supplementary file 1 [file get_supplementary_file.php]

## Sheet: Tabelle1
outcome	Dia r (mm)	Dia l (mm)	Dia cum	FEV1 (%)	VC (%)	RV (%)	BE	p0.1/pimax	Dia r 2 (mm)	Dia l 2 (mm)	Dia cum 2	Dia diff	FEV 1	VC	RV	BE	p0.1/pimax	outcome
+	25	21	46	29	46	455	1.4	25	54	31	85	39	31	44	265	0.3	21	+
+	28	31	59	37	64	316	- 1.1	11	46	49	95	36	49	73	252	- 2.6	6	+
O	0	0	0	16	35	392	10.8	53	11	14	25	25	18	35	294	7.4	48	O
+	25	0	25	38	55	292	- 1.3	31	33	6	39	14	32	59	125	- 1.5	17	+
+	30	19	49	24	45	234	6.6	34	38	32	70	21	33	62	248	4.8	19	+
O	10	8	18	34	61	232	- 0.3	13	14	19	33	15	25	33	338	3.1	n.n.	O
+	23	28	51	29	49	266	3.0	28	38	33	71	20	24	42	209	2.2	40	+
O	14	16	30	25	38	240	4.8	13	22	28	50	20	30	49	251	3.0	7	O
+	0	31	31	28	50	362	8.4	17	14	26	40	9	32	61	323	6.0	5	+
+	23	18	41	23	40	201	2.8	21	56	31	87	46	31	52	258	- 0.3	11	+
+	25	22	47	25	49	314	- 4.4	13	35	29	64	17	38	59	297	- 1.6	18	+															41/34 – 24	(27.08.15)
+	35	29	64	30	50	256	- 2.5	11	41	34	75	11	33	57	265	- 1.4	10	+
+	19	11	30	37	62	226	1.2	21	58	42	100	70	40	57	234	2.0	10	+
+	22	9	31	33	55	243	5.1.	49	28	12	40	9	40	66	213	2.8	20	+
+	15	18	33	22	26	225	0.6	n.a.	8	25	33	0	24	31	251	1.2	21	+
+	34	28	62	28	35	247	2.3	47	47	32	79	17	47	65	195	1.1	28	+
O	22	30	52	21	39	249	10.5	39	20	28	48	-4	22	45	322	17.6	16	O
+	16	31	47	28	43	243	9.1	17	44	39	83	36	36	64	165	0.1	8	+
O	7	13	20	35	61	245	4.5	12	5	11	16	-4	23	42	370	5.1	57	O
O	36	31	67	32	52	341	0.4	33	30	27	57	-10	29	52	273	1.5	17	O
+	24	31	55	36	61	486	-0,7	6	40	48	88	33	44	74	239	0.5	11	+
+	36	19	55	29	46	313	4.4	6	38	34	72	17	32	59	183	4.3	5	+
+	11	34	45	41	67	235	6.3	9	48	24	72	27	57	78	182	3.8	n.a.	+
+	27	30	57	31	57	243	0.0	n.a.	68	48	116	59	43	78	220	- 0.3	11	+
+	8	23	31	26	45	263	5.2	16	24	38	62	31	29	57	314	4.0	19	+
+	38	38	76	24	38	238	5.7	n.a.	52	63	115	39	28	53	230	3.5	17	+
+	20	23	43	30	50	242	4.0	n.a.	34	35	69	26	37	60	226	-0.6	28	+
+	16	26	42	40	54	248	1.5	23	26	40	66	24	44	57	197	0.4	17	+
+	26	24	50	36	62	300	2.6	10	44	38	82	32	41	72	191	-2.4	20	+
+	43	35	78	44	64	236	-2.7	10	47	54	101	23	45	79	221	-1.6	10	+
O	18	39	57	31	40	335	0.6	26	26	42	68	11	24	38	239	1.2	48	O
+	24	23	47	23	36	325	2018-09-01	38	54	43	97	50	29	55	333	2.8	16	+
O	26	13	39	23	37	311	2018-08-04	30	25	15	40	1	22	44	331	4.6	28	O
+	30	14	44	22	43	470	2018-09-01	42	49	22	71	27	21	45	412	4.1	45	+
+	46	18	64	30	46	233	-0.5	16	46	28	74	10	37	55	222	1.5	10	+
+	8	10	18	32	49	203	3.8	13	20	17	37	19	30	47	222	5.7	n.a.	+
+	8	7	15	23	42	292	3.2	15	22	34	56	41	25	44	313	2.9	10	+
+	14	15	29	25	47	241	6.2	12	24	39	63	34	24	40	270	8.2	12	+
+	17	14	31	18	44	371	1.8	20	47	30	77	46	22	49	308	0.2	18	+
+	26	39	65	28	49	223	3.3	45	39	43	82	17	33	60	159	4.8	n.a.	+
+	28	18	46	28	52	343	-0.8	31	52	70	122	76	46	89	230	-0.8	10	+
+	5	11	16	26	44	237	5.4	20	7	25	32	16	29	52	212	1.7	14	+
+	9	11	20	22	43	463	4.1	36	25	34	59	39	28	55	372	4.4	22	+
+	15	14	29	28	60	301	3.2	11	16	22	38	9	30	64	288	1.4	10	+
